# Supplementary material for: Modeling Human Lung Cells Exposure to Wildfire Uncovers Aberrant lncRNAs Signature
Source: MDPI journal article supplement (doi:10.3390/biom13010155), 2023-01-12
Supplement: s1 [file s1]

Supplementary Table S1. PAHs concentration (ug/m<sup>3</sup>) for the two different fuel smokes

| Compounds                    | Smoke A |          |       | Smoke B |          |       |
|------------------------------|---------|----------|-------|---------|----------|-------|
|                              | Total   | Particle | Gas   | Total   | Particle | Gas   |
| 1-ethyl-2-methylnaphthalene  | 0.090   |          | 0.090 | 0.219   |          | 0.219 |
| 1-methylfluorene             | 2.108   | 2.020    | 0.088 | 8.299   | 8.160    | 0.139 |
| 1-methylnaphthalene          | 38.27   | 0.323    | 37.94 | 16.22   | 0.250    | 15.97 |
| 1,2-dimethylnaphthalene      | 0.783   |          | 0.783 | 1.004   | 0.211    | 0.793 |
| 1,3+1,6+1,7-dimethylnaphth   | 10.45   | 3.446    | 7.007 | 5.563   | 0.735    | 4.828 |
| 1,4,5-trimethylnaphthalene   | 15.43   | 12.74    | 2.683 | 1.336   | 0.784    | 0.552 |
| 1,4+1,5+2,3-dimethylnaphth   |         |          |       | 1.021   | 0.180    | 0.842 |
| 1,7-dimethylphenanthrene     |         |          |       | 0.480   | 0.480    |       |
| 1,8-dimethylnaphthalene      |         |          |       | 0.137   |          | 0.137 |
| 2-methylbiphenyl             | 0.445   | 0.375    | 0.070 | 0.227   | 0.182    | 0.045 |
| 2-methylnaphthalene          | 38.05   | 0.396    | 37.65 | 22.14   | 0.542    | 21.60 |
| 2,3,5+1-trimethylnaphthalene | 1.437   | 1.190    | 0.247 | 0.701   | 0.307    | 0.394 |
| 2,4,5-trimethylnaphthalene   | 16.83   | 13.58    | 3.245 | 3.208   | 1.653    | 1.555 |
| 2,6+2,7-dimethylnaphthalene  | 1.775   | 0.489    | 1.286 | 3.331   | 1.673    | 1.657 |
| 3-methylchrysene             |         |          |       | 0.096   | 0.096    |       |
| 3,6-dimethylphenanthrene     |         |          |       | 0.045   | 0.045    |       |
| 4-methylpyrene               | 0.504   | 0.504    |       | 0.523   | 0.522    | 0.001 |
| 4,5-methylenephenanthrene    | 0.963   | 0.962    | 0.002 | 0.562   | 0.555    | 0.008 |
| 7-methylbenz[a]anthracene    | 0.809   | 0.809    |       |         |          |       |
| a-methylfluorene             | 2.321   | 2.227    | 0.094 | 1.986   | 1.827    | 0.159 |
| acenaphthene                 | 1.436   | 0.945    | 0.490 | 0.721   | 0.224    | 0.497 |
| anthanthrene                 | 0.156   | 0.156    |       | 0.185   | 0.185    |       |
| anthrone                     | 14.12   | 14.12    |       |         |          |       |
| b-dimethylphenanthrene       | 0.442   | 0.442    |       | 0.190   | 0.190    |       |
| b-methylfluorene             |         |          |       | 0.057   |          | 0.057 |
| b-trimethylnaphthalene       | 1.810   | 1.567    | 0.243 | 0.506   | 0.238    | 0.268 |
| benzo[a]fluoranthene         | 0.227   | 0.227    |       | 0.361   | 0.361    |       |
| benzo[a]fluorene             | 0.574   | 0.574    |       | 0.341   | 0.341    |       |
| benzo[a]pyrene               | 0.533   | 0.533    |       | 0.664   | 0.657    | 0.006 |
| benzo[b]chrysene             | 0.084   | 0.084    |       | 0.098   | 0.098    |       |
| benzo[b]fluorene             | 0.255   | 0.255    |       | 0.137   | 0.137    |       |
| benzo[c]phenanthrene         | 0.334   | 0.334    |       | 0.324   | 0.324    |       |
| benzo[e]pyrene               | 0.264   | 0.264    |       | 0.394   | 0.394    |       |
| benzo[ghi]perylene           | 0.352   | 0.352    |       | 0.540   | 0.540    |       |
| benzo[j]fluoranthene         | 0.466   | 0.466    |       | 0.681   | 0.681    |       |
| benzo[k]fluoranthene         | 0.366   | 0.366    |       | 0.393   | 0.393    |       |
| c-mepy/mefl                  | 0.556   | 0.556    |       | 0.210   | 0.210    |       |
| c-trimethylnaphthalene       | 3.272   | 2.188    | 1.085 | 0.961   | 0.335    | 0.626 |
| coronene                     | 0.107   | 0.107    |       | 0.155   | 0.155    |       |

|                            |       |       |        |       |       |       |
|----------------------------|-------|-------|--------|-------|-------|-------|
| cyclopenta[c,d]pyrene      |       |       |        | 0.829 | 0.829 |       |
| d-mepy/mefl                | 1.240 | 1.240 |        | 0.306 | 0.306 |       |
| dibenzo[a,e]pyrene         | 0.084 | 0.084 |        | 0.095 | 0.095 |       |
| dibenzo[a,h]anthracene     | 0.110 | 0.110 |        | 0.122 | 0.122 |       |
| dibenzo[a,h]pyrene         | 0.273 | 0.273 |        | 0.100 | 0.100 |       |
| dibenzo[a,i]pyrene         | 0.148 | 0.148 |        |       |       |       |
| dibenzo[a,j]anthracene     | 0.048 | 0.048 |        | 0.076 | 0.076 |       |
| dibenzo[a,l]pyrene         | 0.075 | 0.075 |        | 0.104 | 0.104 |       |
| dibenzo[a,c]anthracene     |       |       |        | 0.031 | 0.031 |       |
| dibenzo[b,k]pyrene         |       |       |        | 0.109 | 0.109 |       |
| dibenzofuran               | 3.368 | 2.282 | 1.085  | 7.346 | 4.947 | 2.399 |
| e-trimethylnaphthalene     | 2.048 | 1.776 | 0.273  | 0.762 | 0.357 | 0.404 |
| f-trimethylnaphthalene     | 1.179 | 0.838 | 0.341  | 0.765 | 0.314 | 0.450 |
| fluorene                   | 3.978 | 3.270 | 0.708  | 9.284 | 8.266 | 1.017 |
| indeno[123-cd]fluoranthene |       |       |        | 0.064 | 0.064 |       |
| j-trimethylnaphthalene     | 1.003 | 0.751 | 0.252  | 0.337 | 0.159 | 0.178 |
| naphthalene                | 119.7 | 1.263 | 118.4  | 73.78 | 0.129 | 73.65 |
| perylene                   | 0.080 | 0.080 |        | 0.121 | 0.121 |       |
| phenanthrene               | 6.518 | 6.315 | 0.204  | 5.155 | 4.444 | 0.711 |
| picene                     | 0.101 | 0.101 |        | 0.118 | 0.118 |       |
| triphenylene               |       |       |        | 0.166 | 0.166 |       |
| xanthone                   | 2.206 | 2.140 | 0.066  | 0.559 | 0.559 |       |
| Total                      | 297.8 | 83.40 | 214.38 | 174.3 | 45.08 | 129.2 |
